# Supplementary material for: Consensus Statement on Future Directions for the Behavioral and Social Sciences in Oral Health
Source: PubMed Central journal article supplement — J Dent Res. 2022 Jan 19;101(6):619–22. doi: 10.1177/00220345211068033 (PMC9124906; doi:10.1177/00220345211068033), 2022-01-19
Supplement: sj-pdf-1-jdr-10.1177_00220345211068033.pdf [file sj-pdf-1-jdr-10.1177_00220345211068033.pdf]

## APPENDIX

### **Consensus Statement on Future Directions for the Behavioral and Social Sciences in Oral Health**

Daniel W. McNeil\*, Cameron L. Randall\*, Sarah Baker, Belinda Borrelli, Jacqueline M. Burgette, Barry Gibson, Lisa J. Heaton, George Kitsaras, Colman McGrath, and J. Timothy Newton

#### ***Summary of Consensus Statement Development Process***

Considering the important role of behavioral and social factors for optimal oral health, the co-first authors (DWM, CLR) organized the Behavioral and Social Oral Health Sciences Summit, guided by a steering committee comprised of the other authors. The Summit was a three-day international meeting of experts and stakeholders representing 57 countries, all career stages, and a wide range of behavioral and social science disciplines and dental specialties. It was held in October and November of 2020. The aims of the Summit were to: describe the state of the field; identify the most significant research gaps and opportunities; and, build consensus about priority areas and future directions for advancing the application of rigorous behavioral and social research to improve oral health globally.

This Consensus Statement is a formal product of the Summit; it was developed with broad participation from the behavioral and social oral health research community and iterative refinement based on expert feedback. First, drawing on Summit content, the authors collaboratively produced a working draft of the Consensus Statement. Next, Summit participants and all members of the International Association for Dental Research (IADR) were invited to provide feedback on the working draft during an open comment period. Using targeted invitations and a snowball recruitment strategy, other stakeholders and relevant groups (e.g., research groups, advocacy groups, professional organizations, non-governmental organizations, funding agencies, industry) were invited to provide feedback during the same period. Comments were submitted on behalf of such groups as well as individuals. Those submitting comments considered the working draft section-by-section and as a whole. Next, drawing on all feedback submitted, the authors edited the working draft in three rounds to produce the final version of the Consensus Statement. Prior to being submitted for publication here, the Consensus Statement was then posted online and the following people/groups were directly invited to sign on as an endorser: all Summit attendees; all members of the IADR Behavioral, Epidemiologic and Health Services Research Group; other relevant stakeholders; any entity that submitted feedback during the open comment period; and anyone who received a forwarded invitation circulated within their professional organization. The more than 400 groups and individuals who endorsed the Consensus Statement are acknowledged below.

**Table. Summary of Emphasis Areas and Overarching Considerations to be Prioritized in Future Research**

| <b>Areas of Emphasis and Overarching Considerations</b>                                                       | <b>Specific Actions Necessary to Advance Research and its Impact</b>                                                                                                                                                                                                                                                                                                          | <b>Illustrative Approaches to Future Research</b>                                                                                                                                                                                                                                                                                                                                                                                                                                                                                                                                                                                                                                                                                                                                                                                                                                                                                                                                                                              |
|---------------------------------------------------------------------------------------------------------------|-------------------------------------------------------------------------------------------------------------------------------------------------------------------------------------------------------------------------------------------------------------------------------------------------------------------------------------------------------------------------------|--------------------------------------------------------------------------------------------------------------------------------------------------------------------------------------------------------------------------------------------------------------------------------------------------------------------------------------------------------------------------------------------------------------------------------------------------------------------------------------------------------------------------------------------------------------------------------------------------------------------------------------------------------------------------------------------------------------------------------------------------------------------------------------------------------------------------------------------------------------------------------------------------------------------------------------------------------------------------------------------------------------------------------|
| Behavioral and social theories and mechanisms related to oral health                                          | <ul style="list-style-type: none"> <li>• Develop testable “middle range” theories (i.e., between study-specific working hypotheses and all-encompassing conceptualizations) to understand how behavioral and social factors shape oral health</li> <li>• Specify detailed, multi-level causal pathways that bridge proximal and distal determinants of oral health</li> </ul> | <ul style="list-style-type: none"> <li>• From evidence in a series of studies, develop a theoretical formulation that focuses on mechanisms that may be involved in the onset and continuation of oral health behaviors or diseases, and then test the tenants of that theory in new research</li> <li>• Simultaneously assess determinants of oral health behaviors in a diversity of racial/ethnic/cultural population groups, including possible conditioning experiences, family and social group influences, and biological factors, among others</li> <li>• Focus specifically on racism, classism, and other forms of power-based oppression as factors systemically affecting oral health and healthcare, as well as the make-up and well-being of the research and clinical workforces in oral health</li> <li>• Using both cross-sectional and longitudinal approaches, focus theory-based research on known robust and clinically meaningful effects, rather than on those with modest explanatory power</li> </ul> |
| Use of multiple and novel methodologies in social and behavioral research and practice related to oral health | <ul style="list-style-type: none"> <li>• Develop theoretically based core of clinically relevant outcomes and health service delivery measures</li> <li>• Create and validate contemporary gold standard measures with strong psychometric properties</li> <li>• Use a range of contemporary qualitative, quantitative, and mixed-methods data approaches</li> </ul>          | <ul style="list-style-type: none"> <li>• Develop an array of mixed (quantitative and qualitative), psychometrically sound, and practical measures of oral health behaviors and outcomes that are nuanced and go beyond self-report and global categorizations, and ensure racial/cultural diversity in development and in normative samples</li> <li>• Use multiple and novel methodologies in research that focus on oral healthcare systems and the training and behavior of those working in those systems</li> </ul>                                                                                                                                                                                                                                                                                                                                                                                                                                                                                                       |

|                                                                                              |                                                                                                                                                                                                                                                                                                                                                                                                                                                                                                                                                                                                                                                                                                                                                                                                                                                                                                                                                                             |                                                                                                                                                                                                                                                                                                                                                                                                                                                                                                                                                                                                                                                                                                                                                                                                                                                                                                                                                                                                                                                            |
|----------------------------------------------------------------------------------------------|-----------------------------------------------------------------------------------------------------------------------------------------------------------------------------------------------------------------------------------------------------------------------------------------------------------------------------------------------------------------------------------------------------------------------------------------------------------------------------------------------------------------------------------------------------------------------------------------------------------------------------------------------------------------------------------------------------------------------------------------------------------------------------------------------------------------------------------------------------------------------------------------------------------------------------------------------------------------------------|------------------------------------------------------------------------------------------------------------------------------------------------------------------------------------------------------------------------------------------------------------------------------------------------------------------------------------------------------------------------------------------------------------------------------------------------------------------------------------------------------------------------------------------------------------------------------------------------------------------------------------------------------------------------------------------------------------------------------------------------------------------------------------------------------------------------------------------------------------------------------------------------------------------------------------------------------------------------------------------------------------------------------------------------------------|
|                                                                                              | <ul style="list-style-type: none"> <li>• Adopt methods for testing theories related to cognitive, affective, and motivational bases of behavior</li> <li>• Utilize causal analysis, complex systems science, and community-engaged research, accounting for individual, environmental, and structural factors (including policies) that influence health</li> </ul>                                                                                                                                                                                                                                                                                                                                                                                                                                                                                                                                                                                                         | <ul style="list-style-type: none"> <li>• Promote skills training in and high-quality research application of advanced statistical methods and techniques for complex designs, including causal analysis, simulation modeling, social network analysis, and agent-based modeling</li> </ul>                                                                                                                                                                                                                                                                                                                                                                                                                                                                                                                                                                                                                                                                                                                                                                 |
| <p>Development and testing of behavioral and social interventions to promote oral health</p> | <ul style="list-style-type: none"> <li>• Focus on both individual and population levels in intervention research</li> <li>• Focus on scalable interventions that can be customized and tailored to individuals and systems</li> <li>• Adopt technological approaches that maximize intervention customization and diffusion through large systems, expanding reach to underserved populations and those who are affected by health inequities</li> <li>• Involve multiple groups of stakeholders at every stage of intervention development and testing</li> <li>• Design interventions using theoretical frameworks</li> <li>• Measure testable mechanisms of change</li> <li>• Focus on individuals and systems that are not yet resourced or motivated for change</li> <li>• Focus on at-risk, disadvantaged, and marginalized communities</li> <li>• Apply and test theories and intervention elements shown to be effective in other healthcare disciplines</li> </ul> | <ul style="list-style-type: none"> <li>• Evaluate the combined effects of simultaneous delivery of individual- and higher-level interventions, including those aimed at prevention</li> <li>• Measure acceptability, amount of use, overall engagement, effectiveness, and/or maintenance of behavior change over time in intervention studies, in particular across diverse racial/cultural and age groups and especially in those involving novel interventions such as technology-based ones</li> <li>• Assess the treatment fidelity of intervention approaches using validated checklists to increase the internal and external validity as well as to aid in dissemination</li> <li>• Study how specific characteristics of interventions and dose are associated with patient satisfaction, engagement, and downstream clinical oral health outcomes</li> <li>• Assess approaches to promote or maintain oral health behaviors, delivered chairside by oral health professionals and in other healthcare settings by other professionals</li> </ul> |

|                                                                                                        |                                                                                                                                                                                                                                                                                                                                                                                                                                                                                                                                                                                                                                                                                                |                                                                                                                                                                                                                                                                                                                                                                                                                                                                                                                                                                                                                                                                                                                                                                                                                                                                                                                                                                                        |
|--------------------------------------------------------------------------------------------------------|------------------------------------------------------------------------------------------------------------------------------------------------------------------------------------------------------------------------------------------------------------------------------------------------------------------------------------------------------------------------------------------------------------------------------------------------------------------------------------------------------------------------------------------------------------------------------------------------------------------------------------------------------------------------------------------------|----------------------------------------------------------------------------------------------------------------------------------------------------------------------------------------------------------------------------------------------------------------------------------------------------------------------------------------------------------------------------------------------------------------------------------------------------------------------------------------------------------------------------------------------------------------------------------------------------------------------------------------------------------------------------------------------------------------------------------------------------------------------------------------------------------------------------------------------------------------------------------------------------------------------------------------------------------------------------------------|
| <p>Dissemination and implementation (D&amp;I) research for oral health</p>                             | <ul style="list-style-type: none"> <li>• Meaningfully involve stakeholders in all aspects of D&amp;I, in research and practice</li> <li>• Attend to contextual factors (at global and local levels)</li> <li>• Adopt contemporary D&amp;I research study designs, using precisely specified methods</li> <li>• Focus on interdisciplinary research that embraces multidirectional interactions among researchers, community members, practitioners, and public policy makers</li> <li>• Leverage behavioral and social “big data” to reduce oral health inequities</li> <li>• Inform public health and policy approaches that support upstream action and a commitment to equity</li> </ul>    | <ul style="list-style-type: none"> <li>• Use D&amp;I research and practice to improve dental care delivery, oral health programs, and healthcare systems—and oral health—through social, cultural, and political systems-level changes, and by increasing adoption and sustained use of evidence-based behavioral and dental interventions</li> <li>• Advance the already robust and growing field of D&amp;I science by employing study designs in oral health research that refine D&amp;I theories, methods, and practice</li> <li>• Disseminate, implement, and scale up methods to prevent and respond to racism and other discrimination (e.g., class-, culture-, and religious-based) that adversely affect oral health and the oral health workforce, including as related to education/training, clinical and research settings, healthcare delivery, and public policy</li> </ul>                                                                                            |
| <p>Overarching considerations for the application of behavioral and social sciences in oral health</p> | <ul style="list-style-type: none"> <li>• Integrate behavioral and social sciences in the education, training, and mentoring of oral health clinicians and researchers</li> <li>• Adopt or enhance multi- and transdisciplinary collaborative and integrative efforts, prioritizing full inclusion, especially of behavioral and social sciences not historically represented in oral health research</li> <li>• Focus on inclusive research that involves population groups that have been marginalized and under-served in oral healthcare and research</li> <li>• Include in research positive aspects of oral health (shifting from a predominant focus on disease and disorder)</li> </ul> | <ul style="list-style-type: none"> <li>• Directly translate the strong existing descriptive behavioral and social oral health research findings into theory-based and mechanism-focused prevention and intervention research, across diverse racial/cultural/age groups, to yield meaningful change</li> <li>• Organize and maintain a multi-disciplinary, multi-career-stage, multi-national group (with intentional inclusion of those from low- and middle-income countries), led by behavioral and social scientists, that provides inspiration, ideas, and guidance for oral health research involving the behavioral and social sciences</li> <li>• Partner with industry in conducting behavioral and social research, as improvements in oral health will require engagement with and changes to the oral healthcare industry and commercial products</li> <li>• Cultivate the behavioral and social sciences as independent entities, and simultaneously transcend</li> </ul> |

|  |  |                                                                                                                                                                                                                                                                                                                                                |
|--|--|------------------------------------------------------------------------------------------------------------------------------------------------------------------------------------------------------------------------------------------------------------------------------------------------------------------------------------------------|
|  |  | <p>disciplinary silos through the full engagement of behavioral and social scientists and researchers from various dental disciplines, in basic and clinical oral health research</p> <ul style="list-style-type: none"><li>• Study social and other forces, including commercial practices and the influence of policy and products</li></ul> |
|--|--|------------------------------------------------------------------------------------------------------------------------------------------------------------------------------------------------------------------------------------------------------------------------------------------------------------------------------------------------|

Note. Illustrations of possible research approaches provided in this table are intended as examples; they do not represent the full scope of necessary future research and their inclusion here is not necessarily based on priority relative potential examples not included.

## ***Endorsement***

### **Groups Endorsing the Consensus Statement**

**Alliance for Oral Health Across Borders**, New York, USA  
**American Association for Dental, Oral, and Craniofacial Research (AADOCR)**, Alexandria, Virginia, USA  
**American Dental Education Association (ADEA) - Behavioral Sciences Section**, Washington, DC, USA  
**Anxiety, Psychophysiology, and Pain Research Laboratory**, West Virginia University, Morgantown, West Virginia, USA  
**Association of State and Territorial Dental Directors**, Reno, NV, USA  
**Behavioral, Epidemiologic and Health Services Research (BEHSR) Scientific Group**, International Association for Dental Research, Alexandria, VA, USA  
**Behaviour Change in Dentistry Network (BeCinD)**, King's College London and University of Manchester, London and Manchester, England, United Kingdom of Great Britain and Northern Ireland  
**British Society for Disability and Oral Health**, United Kingdom of Great Britain and Northern Ireland  
**British Society of Periodontology and Implant Dentistry**, Liverpool, United Kingdom of Great Britain and Northern Ireland  
**Center for Craniofacial and Dental Genetics (CCDG)**, University of Pittsburgh, Pittsburgh, Pennsylvania, USA  
**Center for Evidence-Based Stomatology**, School & Hospital of Stomatology, Wuhan University, Wuhan, Hubei, China  
**Center for Integrative Global Oral Health**, University of Pennsylvania School of Dental Medicine, Philadelphia, Pennsylvania, USA  
**Center for Molecular and Clinical Epidemiology of Infectious Diseases**, University of Michigan, Ann Arbor, Michigan, USA  
**Center for Oral Health Research in Appalachia (COHRA)**, University of Pittsburgh, Pittsburgh, Pennsylvania, USA, and West Virginia University, Morgantown, West Virginia, USA  
**Center to Address Disparities in Children's Oral Health (CAN DO)**, University of California San Francisco, San Francisco, California, USA  
**Colgate Palmolive Company**, Piscataway, New Jersey, USA  
**Deanship of Scientific Research**, Al-Quds University, Jerusalem, Palestine  
**DeCare Dental, Vision & Wellness Ireland and Europe**, National University of Ireland Galway, Dublin, Leinster, Ireland  
**Dental Health Services Victoria**, Melbourne, Victoria, Australia  
**Dental Hygienists Association of Australia (DHAA)**, Melbourne, Victoria, Australia  
**Department of Dental Medicine Division of Pediatric Dentistry**, Jamaica Hospital Medical Center, Jamaica, New York, USA  
**Department of Preventive and Community Dentistry - School of Dentistry**, Universidad de Buenos Aires, Buenos Aires, CABA, Argentina  
**Family and Community Intervention Lab**, University of Arkansas, Fayetteville, Arkansas, USA  
**German Society of Oral Epidemiology and Healthcare Research**, German Society of Dentistry and Oral Medicine, Giessen, Hesse, Germany  
**Grupo de Investigación en Salud Pública, Educación y Profesionalismo Médico**, Universidad de los Andes, Bogotá D.C., Colombia  
**Humble Smile Foundation**, Sundbyberg, Stockholm, Sweden  
**Indigenous Oral Health Unit**, University of Adelaide, Adelaide, South Australia, Australia  
**Institut der Deutschen Zahnärzte**, Witten/Herdecke University, Cologne, North Rhine-Westphalia, Germany  
**International Association for Dental Research (IADR)**, Alexandria, Virginia, USA  
**Irish Dental Hygienist Association (IDHA)**, Dublin, Ireland

**Irish Society of Disability and Oral Health**, Dublin, Ireland  
**Malaysian Association of Dental Public Health Specialists**, Kuala Lumpur, Federal Territory of Kuala Lumpur, Malaysia  
**New Mexico Oral Health Coalition (NMOHC)**, Albuquerque, Santa Fe, Las Cruces, and Farmington, New Mexico, USA  
**Oral Health Centre of Expertise**, Stavanger, Rogaland, Norway  
**Oral Health Equity Core, Institute for Inclusion, Inquiry, and Innovation (iCubed)**, Virginia Commonwealth University, Richmond, Virginia, USA  
**Peninsula Dental School**, University of Plymouth, Plymouth, Devon, United Kingdom of Great Britain and Northern Ireland  
**Poche Centre for Indigenous Health**, The University of Sydney, Camperdown, New South Wales, Australia  
**School of Clinical Dentistry**, University of Sheffield, Sheffield, South Yorkshire, United Kingdom of Great Britain and Northern Ireland  
**School of Dental Sciences**, Newcastle University, Newcastle upon Tyne, Tyne and Wear, United Kingdom of Great Britain and Northern Ireland  
**Seniors Dental Care Australia**, Ipswich, Queensland, Australia  
**The British Association for the Study of Community Dentistry (BASCD)**, United Kingdom of Great Britain and Northern Ireland  
**Toothfriendly Foundation**, Basel, Basel, Switzerland  
**West Virginia Dental Hygienists' Association**, Charleston, West Virginia, USA  
**West Virginia University School of Dentistry Research Committee**, West Virginia University, Morgantown, West Virginia, USA  
**WHO Collaborating Center Quality Improvement & Evidence-based Dentistry**, New York University, New York, New York, USA

### **Individuals Endorsing the Consensus Statement**

**Norintan Ab-Murat**, University of Malaya, Kuala Lumpur, Malaysia  
**Hazem Abbas**, Tohoku University, Sendai, Miyagi, Japan  
**Hams H. Abdelrahman**, Alexandria University, Alexandria, Egypt  
**Naif Abogazalah**, King Khalid University College of Dentistry, Abha, Asir, Saudi Arabia  
**Lucas G. Abreu**, Universidade Federal de Minas Gerais, Belo Horizonte, Minas Gerais, Brazil  
**Pauline Adair**, Queen's University, Belfast, Co Antrim, United Kingdom of Great Britain and Northern Ireland  
**Razia Z. Adam**, University of the Western Cape, Cape Town, Western Cape, South Africa  
**Himanshi Aggarwal**, Saraswati Dental College, Lucknow, India  
**Nilufar Ahmed**, University of Bristol, Bristol, United Kingdom of Great Britain and Northern Ireland  
**Aderonke Akinkugbe**, Virginia Commonwealth University, Richmond, Virginia, USA  
**Walid A. Al-Soneidar**, McGill University, Montreal, Québec, Canada  
**Bakheet M. Alaa**, Our Lady of Fatima University, Metro Manila, Valenzuela, Philippines  
**Judith Albino**, University of Colorado Anschutz Medical University, Denver, Colorado, USA  
**Linda A. Alexander**, West Virginia University, Morgantown, WV, USA  
**Arlene Cecilia A. Alfaro**, University of the Philippines Manila, Manila, Philippines  
**Finbarr Allen**, National University of Singapore, Singapore, United Kingdom of Great Britain and Northern Ireland  
**Paul Allison**, McGill University, Montreal, Quebec, Canada  
**Dua'a Almegbil**, University of Sheffield, Sheffield, South Yorkshire, United Kingdom of Great Britain and Northern Ireland  
**Andre Mariz Almeida**, Instituto Universitário Egas Moniz, Lisboa, Portugal  
**Saad H. A. S. Alqahtani**, Ministry of Health, Qasr, Jahra, Kuwait  
**Lina AlQobaly**, Taibah University, Madinah, Madinah, Saudi Arabia  
**Abdulrahman Alsaad**, Riyadh Elm University, Riyadh, Riyadh, Saudi Arabia

**Dalil Alshammari**, University of Manchester, Manchester, Greater Manchester, United Kingdom of Great Britain and Northern Ireland

**Aws Fakhri Alzwghaibi**, Shahid Beheshti University of Medical Sciences, Tehran, Iran

**Euridsse Sulemane Amade**, National Institute of Health, Maputo, Maputo Cidade, Mozambique

**Vesna Ambarkova**, Cyril & Methodius University Skopje, Skopje, The former Yugoslav Republic of Macedonia

**Jeongwi An**, West Virginia University, Morgantown, WV, USA

**Oelisoa M. Andriankaja**, University of Puerto Rico, San Juan, Puerto Rico, USA

**Ainol Haniza Kherul Anuwar**, University of Malaya, Kuala Lumpur, Malaysia

**Thiago Machado Ardenghi**, Federal University of Santa Maria, Santa Maria, Rio Grande do Sul, Brazil

**Arheiam Arheiam**, University of Benghazi, Benghazi, Libyan Arab Jamahiriya

**Mbende Eliane Aurelie**, University of Yaounde I, Yaounde, Center, Cameroon

**Muneer Gohar Babar**, International Medical University, Kuala Lumpur, Malaysia

**Sarah R. Baker**, University of Sheffield, Sheffield, South Yorkshire, United Kingdom of Great Britain and Northern Ireland

**Ramaa Balkaran**, The University of the West Indies, St. Augustine, Trinidad and Tobago

**Anzany Tania Dwi Putri Baringbing**, Indonesian National Narcotics Board Drug Rehabilitation Center, Bogor, Jawa Barat, Indonesia

**Emma Barnes**, Cardiff University, Cardiff, United Kingdom of Great Britain and Northern Ireland

**Sule Batu**, Istanbul University, Istanbul, Turkey

**Abbie O'Ferrell Beacham**, University of Louisville, Louisville, KY, USA

**Darragh Beecher**, University College Cork, Cork, Ireland

**Alexander Bendayan**, Boston University Henry M. Goldman School of Dental Medicine, Boston, Massachusetts, USA

**Amrit Bhatti**, University of Leeds, Leeds, West Yorkshire, United Kingdom of Great Britain and Northern Ireland

**Maria Gabriela H. Biazovic**, University of São Paulo, São Paulo, Brazil

**Paul Block**, William James College, Barrington, Rhode Island, USA

**Rafael Aiello Bomfim**, Federal University of Mato Grosso do Sul, Campo Grande, Mato Grosso do Sul, Brazil

**Diann Bomkamp**, St. Louis, Missouri, USA

**Belinda Borrelli**, Boston University Henry M. Goldman School of Dental Medicine, Boston, Massachusetts, USA

**João Botelho**, Egas Moniz - Cooperativa de Ensino Superior, CRL, Lisbon, Portugal

**Elizabeth A. Boutsis**, Lavrio Health Center, Lavrio, Attica, Greece

**Kevin L. Boyd**, Lurie Children's Hospital, Chicago, Illinois, USA

**Tegwyn H. Brickhouse**, Virginia Commonwealth University, Richmond, Virginia, USA

**Jonathan M. Broadbent**, University of Otago, Dunedin, Otago, New Zealand

**Tom Broomhead**, The University of Sheffield, Sheffield, South Yorkshire, United Kingdom of Great Britain and Northern Ireland

**Patricia S. Brown**, University of Washington, Seattle, Washington, USA

**Jamey T. Brumbaugh**, West Virginia University, Morgantown, West Virginia, USA

**Erin Ealba Bumann**, University of Missouri - Kansas City, Kansas City, Missouri, USA

**Daniela Bustos**, Particular, Santiago, Región Metropolitana, Chile

**Kevin Matthew Byrd**, ADA Science and Research Institute, Gaithersburg, Maryland, USA

**Susana J. Calderon**, Illinois State University, Normal, Illinois, USA

**Guglielmo Campus**, University of Bern, Bern, Switzerland

**Helen Cartner**, Northumbria University, Newcastle upon Tyne, Tyne and Wear, United Kingdom of Great Britain and Northern Ireland

**Paola Carvajal**, University of Chile, Santiago, Santiago, Chile

**Roger Keller Celeste**, Federal University of Rio Grande do Sul, Porto Alegre, Rio Grande do Sul, Brazil



**Andrés Celis**, University of Chile, Santiago, Santiago, Chile  
**Maximiliano S. Cenci**, Universidade Federal de Pelotas, Pelotas, Rio Grande do Sul, Brazil  
**Sanaa Chala**, Mohammed V University in Rabat, Rabat, Morocco  
**Claire Chang**, Boston University, Boston, Massachusetts, USA  
**Akhilanand Chaurasia**, King George's Medical University, Lucknow, Uttar-Pradesh, India  
**Radhika Chhibber**, McGill University, Montreal, Quebec, Canada  
**Gail Childs**, University of Florida College of Dentistry, Gainesville, FL, USA  
**Gary T. Chiodo**, University of Washington School of Dentistry, Seattle, Washington, USA  
**Remus Chunda**, Dental Therapist, Dumfries and Galloway, Scotland, United Kingdom of Great Britain and Northern Ireland  
**Sun Oh Chung**, University of Washington, Seattle, Washington, USA  
**Jeanne Chung**, Colgate Palmolive, Piscataway, New Jersey, USA  
**Joseph Flaherty Churchill**, Lower Elwha Klallam Tribe, Sequim, Washington, USA  
**Lois K. Cohen**, National Institute of Dental and Craniofacial Research, National Institutes of Health, Bethesda, Maryland, USA  
**Robert J. Collins Jr.**, University of Pennsylvania, Philadelphia, Pennsylvania, USA  
**Carolina Yanez Contreras**, Universidad San Sebastian, Valdivia, Chile  
**Marco Cornejo**, University of Chile, Santiago, Santiago, Chile  
**James Coughlan**, Barts and The London School of Medicine and Dentistry, Queen Mary University of London, London, Greater London, United Kingdom of Great Britain and Northern Ireland  
**Stephanie Cruz**, University of Washington, Seattle, Washington, USA  
**Julia Csikar**, The University of Leeds, Leeds, West Yorkshire, United Kingdom of Great Britain and Northern Ireland  
**Cristina B. Culacciati**, Universidad de Buenos Aires, Ciudad Autónoma de Buenos Aires, Buenos Aires, Argentina  
**Joana Cunha-Cruz**, University of Alabama, Birmingham, Alabama, USA  
**Charlotte C. Currie**, Newcastle University, Newcastle Upon Tyne, Tyne and Wear, United Kingdom of Great Britain and Northern Ireland  
**Karen Danke**, Universidad de Chile, Santiago, Santiago, Chile  
**Elaine L. Davis**, University at Buffalo, Buffalo, New York, USA  
**Aimee Dawson**, Université Laval, Québec, Québec, Canada  
**David R. Dean**, University of Washington, Seattle, Washington, USA  
**Jennifer Deane**, Newcastle University, Newcastle Upon Tyne, United Kingdom of Great Britain and Northern Ireland  
**Chris Deery**, University of Sheffield, Sheffield, South Yorkshire, United Kingdom of Great Britain and Northern Ireland  
**Renate Deinzer**, Justus Liebig University, Giessen, Hesse, Germany  
**Flavio Fernando Demarco**, Federal University of Pelotas, Pelotas, Rio Grande do Sul, Brazil  
**Heidi Desmarais**, Eastern Washington University, Spokane, Washington, USA  
**Iwan Dewanto**, Indonesian Dental Association and School of Dentistry University Muhammadiyah Yogyakarta, Sleman, DI Yogyakarta, Indonesia  
**Cássia Dezan-Garbelini**, State University of Londrina, Londrina, Paraná, Brazil  
**Kunaal Dhingra**, Centre for Dental Education and Research, All India Institute of Medical Sciences, New Delhi, India  
**Andreea Cristiana Didilescu**, Carol Davila University of Medicine and Pharmacy, Bucharest, Romania  
**Kimon Divaris**, University of North Carolina at Chapel Hill, Chapel Hill, North Carolina, USA  
**Loc Do**, The University of Queensland, Brisbane, Queensland, Australia  
**David Dunning**, University of Nebraska Medical Center, Lincoln, Nebraska, USA  
**Angela Durey**, University of Western Australia, Perth, Western Australia, Australia  
**Samuel F. Dworkin**, University of Washington, Seattle, Washington, USA  
**Burton L. Edelstein**, Columbia University, New York, New York, USA  
**Uyi Idah Ekowmenhenhen**, Lagos University Teaching Hospital, Idiara, Lagos State, Nigeria

**Ian Richard Epondulan**, The University of Sydney, Sydney, New South Wales, Australia  
**Susana Margarita Lorenzo Erro**, Universidad de la República, Montevideo, Uruguay  
**Negin Eslamiamirabadi**, McGill University, Montreal, Quebec, Canada  
**Iris L. Espinoza**, University of Chile, Santiago, Santiago, Chile  
**Dominik A. Ettlin**, University of Zurich, Zurich, Zurich, Switzerland  
**Nathalia Fernandes Fagundes**, University of Alberta, Edmonton, Alberta, Canada  
**Jocelyne S. Feine**, McGill University, Montreal, Quebec, Canada  
**Carlos Alberto Feldens**, Lutheran University of Brazil, Porto Alegre, Rio Grande do Sul, Brazil  
**Raquel C. Ferreira**, Federal University of Minas Gerais, Belo Horizonte, Minas Gerais, Brazil  
**Tracy L Finlayson**, San Diego State University, San Diego, California, USA  
**Eleanor Fleming**, Meharry Medical College, Nashville, Tennessee, USA  
**Michael Foley**, University of Queensland, Brisbane, Queensland, Australia  
**Natalia Fortich-Mesa**, Corporacion Universitaria Rafael Nunez, Cartagena, Bolivar, Colombia  
**Chelsea Fosse**, American Dental Association, Chicago, Illinois, USA  
**Sarah E. Francis**, West Virginia University, Morgantown, WV, USA  
**Balgis Gaffar**, Imam Abdulrahman bin Faisal university, Dammam, Eastern province, Saudi Arabia  
**Julie Gallagher**, University College London, London, United Kingdom of Great Britain and Northern Ireland  
**Jesus Carlos Galvan**, Albuquerque, New Mexico, USA  
**Stuart A. Gansky**, University of California San Francisco, San Francisco, California, USA  
**Xiaoli Gao**, National University of Singapore, Singapore, Singapore  
**Sandra Garbely-Kerkovich**, Choptank Community Health, Bishopville, Maryland, USA  
**Dina Tamar Garcia**, Virginia Commonwealth University, Richmond, Virginia, USA  
**Alejandra García-Quintana**, Universidad Central de Venezuela, Caracas, Miranda, Bolivarian Republic of Venezuela  
**Frank L. Gardner**, School of Health Sciences of Touro College, New York, New York, USA  
**Arwa Z. Gazzaz**, University of British Columbia, Vancouver, British Columbia, Canada  
**Andrew R. Geddis-Regan**, Newcastle University, Newcastle upon Tyne, Tyne and Wear, United Kingdom of Great Britain and Northern Ireland  
**William V. Giannobile**, Harvard School of Dental Medicine, Boston, Massachusetts, USA  
**Barry John Gibson**, University of Sheffield, Sheffield, South Yorkshire, United Kingdom of Great Britain and Northern Ireland  
**Jilly Gibson-Miller**, University of Sheffield, Sheffield, Yorkshire, United Kingdom of Great Britain and Northern Ireland  
**Efrat Gilon**, Tel-Aviv University, Tel-Aviv, Israel  
**Jeannie Ginnis**, University of North Carolina Adams School of Dentistry, Chapel Hill, North Carolina, USA  
**Noha A. E. Gomaa**, Western University, London, Ontario, Canada  
**Juliana Gomez**, Colgate-Palmolive, Manchester, Greater Manchester, United Kingdom of Great Britain and Northern Ireland  
**Michaela Goodwin**, University of Manchester, Manchester, United Kingdom of Great Britain and Northern Ireland  
**Kara A. Gray-Burrows**, University of Leeds, Leeds, West Yorkshire, United Kingdom of Great Britain and Northern Ireland  
**Sonia Groisman**, Federal University of Rio de Janeiro, Rio de Janeiro, Brazil  
**Carol C. Guarnizo-Herreno**, Universidad Nacional de Colombia, Bogota, Distrito Capital, Colombia  
**Shilpa Gunjal**, Mahsa University, Jenjarom, Selangor, Malaysia  
**Anisha Gupta**, University of Bristol, Bristol, England, United Kingdom of Great Britain and Northern Ireland  
**Dandara Gabriela Haag**, University of Adelaide, Adelaide, South Australia, Australia  
**Faisal F. Hakeem**, Taibah University, Madinah, Madinah, Saudi Arabia  
**Martin Hall**, Dental Health Services Victoria, Melbourne, Victoria, Australia

**Takashi Hanioka**, Fukuoka Dental College, Fukuoka City, Fukuoka, Japan  
**Máiréad Antoinette Harding**, University College Cork, Cork, Ireland  
**Dana Harris**, American Dental Hygiene Association, West Richland, Washington, USA  
**Rebecca Harris**, University of Liverpool, Liverpool, Merseyside, United Kingdom of Great Britain and Northern Ireland  
**Paul Hatton**, The University of Sheffield, Sheffield, South Yorkshire, United Kingdom of Great Britain and Northern Ireland  
**Lisa J. Heaton**, University of Washington, Seattle, Washington, USA  
**Brenda Heaton**, Boston University, Boston, Massachusetts, USA  
**Anna Maria Heikkinen**, University of Helsinki, Helsinki, Uusimaa, Finland, Suomi  
**Masahiro Heima**, Kagoshima University, Kagoshima, Kagoshima, Japan  
**Richard Heimberg**, Temple University, Philadelphia, Pennsylvania, USA  
**Michelle Henshaw**, Boston University, Boston, Massachusetts, USA  
**Brenda Yuliana Herrera-Serna**, Universidad Autónoma de Manizales, Manizales, Caldas, Colombia  
**Richard E. Heyman**, New York University, New York, New York, USA  
**Noor Syahidah Hisamuddin**, University of Malaya, Kuala Lumpur, Federal Territory of Kuala Lumpur, Malaysia  
**Alexander C. L. Holden**, The University of Sydney, Sydney, New South Wales, Australia  
**Richard Holliday**, Newcastle University, Newcastle upon Tyne, Tyne and Wear, United Kingdom of Great Britain and Northern Ireland  
**Richard D. Holmes**, Newcastle University, Newcastle upon Tyne, Tyne and Wear, United Kingdom of Great Britain and Northern Ireland  
**Matt Hopcraft**, University of Melbourne, Melbourne, Victoria, Australia  
**Uma M. Irfan**, Case Western Reserve University, Cleveland, Ohio, USA  
**Lisa M. Jamieson**, University of Adelaide, Adelaide, South Australia, Australia  
**Barbara Janssens**, Ghent University, Ghent, Flanders, Belgium  
**Newell W. Johnson**, Griffith University, Brisbane, Queensland, Australia  
**Judith Ann Jones**, University of Detroit Mercy, Detroit, Michigan, USA  
**Birgitta Jönsson**, University of Gothenburg, Gothenburg, Västra Götalandsregionen, Sweden  
**Mohammed Junaid**, University of Western Australia, Nedlands, Western Australia, Australia  
**Zvonimir Kaic**, Croatian Academy of Medical Sciences, Zagreb, Croatia  
**Mel L. Kantor**, University of Wisconsin-Eau Claire, Eau Claire, Wisconsin, USA  
**Elizabeth C. Kao**, West Virginia University, Morgantown, West Virginia, USA  
**Flavia P. Kapos**, University of Washington, Seattle, Washington, USA  
**Elham Kateeb**, Al-Quds University, Jerusalem, Palestine  
**Vartika Kathuria**, New Delhi, Delhi, India  
**Lydia Georgieva Katrova**, Faculty of Dental Medicine of the Medical University of Sofia, Bulgaria, Sofia, Bulgaria  
**Ali Kazemian**, Mashhad University of Medical sciences, Mashhad, Khorasan-e Razavi, Iran  
**Cristin Kearns**, University of California, San Francisco, San Francisco, California, USA  
**Aengus Kelly**, University of Plymouth, Plymouth, Devon, United Kingdom of Great Britain and Northern Ireland  
**Salsbeel Khan**, The University of Lahore, Lahore, Punjab, Pakistan  
**Marc T. Kiviniemi**, University of Kentucky, Lexington, Kentucky, USA  
**Celeste Kong**, Boston University, Boston, Massachusetts, USA  
**Carrie Krekoski**, University of British Columbia, Vancouver, British Columbia, Canada  
**Carol Kunzel**, Columbia University, New York, New York, USA  
**Satu Lahti**, University of Turku, Turku, Finland  
**Jaime Lawson**, Virginia Commonwealth University, Richmond, Virginia, USA  
**Linda LeResche**, University of Washington, Seattle, Washington, USA  
**Lenny Lesa**, University of Malaya, Kuala Lumpur, Kuala Lumpur, Malaysia  
**Alissa Levine**, McGill University, Montreal, Quebec, Canada  
**Nareudee Limpuangthip**, Chulalongkorn University, Bangkok, Pathumwan, Thailand

**Chia-Shu Lin**, National Yang Ming Chiao Tung University, Taipei, Taiwan  
**James A. Lipton**, University of Pennsylvania, Philadelphia, Pennsylvania, USA  
**Stefan Listl**, Radboud University, Nijmegen, Gelderland, Netherlands  
**Kathy M. Lituri**, Boston University, Boston, Massachusetts, USA  
**Naty Lopez**, University of Minnesota, Minneapolis, Minnesota, USA  
**Vanessa Machado**, Egas Moniz - Cooperativa de Ensino Superior, CRL, Lisbon, Portugal  
**Ana Cristina Mafla**, Universidad Cooperativa de Colombia, Pasto, Nariño, Colombia  
**Waad Elfatih Omer Mahadi**, Khartoum University, Khartoum, Sudan  
**Mohamed Ali Mami**, Tripoli university, Tripoli, Libyan Arab Jamahiriya, Libya  
**Lloyd Mancl**, University of Washington, Seattle, Washington, USA  
**David J. Manton**, University of Groningen, Groningen, Groningen, Netherlands  
**Mary L. Marazita**, University of Pittsburgh, Pittsburgh, Pennsylvania, USA  
**Kanchan Marcus**, The University of Sydney, Sydney, New South Wales, Australia  
**Zoe Marshman**, University of Sheffield, Sheffield, South Yorkshire, United Kingdom of Great Britain and Northern Ireland  
**Vijay Prakash Mathur**, All India Institute of Medical Sciences, New Delhi, Delhi, India  
**Gerardo Maupome**, Indiana University, Indianapolis, Indiana, USA  
**Aurelie Eliane Mbende**, University of Yaounde I, Yaounde, Center, Cameroon  
**Eleanor L. McGlinchey**, Fairleigh Dickinson University, Teaneck, New Jersey, USA  
**Colman McGrath**, University of Hong Kong, Hong Kong, Hong Kong SAR, China  
**Valrie J. McKenzie**, University of Technology, Jamaica, Kingston, Jamaica  
**Christy McKinney**, University of Washington, Seattle, Washington, USA  
**Cheryl B. McNeil**, West Virginia University, Morgantown, West Virginia, USA  
**Daniel W. McNeil**, West Virginia University, Morgantown, West Virginia, USA  
**Jocelyn A. Medina-Paneto**, University of Puerto Rico, San Juan, Puerto Rico, USA  
**Dalia E. Meisha**, King Abdulaziz University, Jeddah, Makkah region, Saudi Arabia  
**Elisabeth Lind Melbye**, Oral Health Center of Expertise - Rogaland, Norway, Stavanger, Rogaland, Norway  
**Ana Lúcia Mello**, Universidade Federal de Santa Catarina, Florianópolis, Santa Catarina, Brazil  
**Michael Antonio F. Mendoza**, University of the Philippines Manila, Manila, Metro Manila, Philippines  
**Elizabeth Mertz**, University of California, San Francisco, San Francisco, California, USA  
**Peter Milgrom**, University of Washington, Seattle, Washington, USA  
**Manasi Murthy Mittinty**, University of Sydney, Sydney, New South Wales, Australia  
**Tuti Mohd-Dom**, The National University of Malaysia, Kuala Lumpur, Federal Territory of Kuala Lumpur, Malaysia  
**Shahida Mohd-Said**, Universiti Kebangsaan Malaysia, Kuala Lumpur, Kuala Lumpur, Malaysia  
**Alexander Montasem**, University of Central Lancashire, Preston, Lancashire, United Kingdom of Great Britain and Northern Ireland  
**Maria Morgan**, Cardiff University, Cardiff, Wales, United Kingdom of Great Britain and Northern Ireland  
**Vanessa Muirhead**, Queen Mary University of London, London, United Kingdom of Great Britain and Northern Ireland  
**Craig Murdoch**, University of Sheffield, Sheffield, South Yorkshire, United Kingdom of Great Britain and Northern Ireland  
**Heikki Murtomaa**, Helsinki University, Helsinki, Uusimaa, Finland  
**Oscar Musalem-Dominguez**, Universitat de Valencia, Valencia, Valencia, Spain  
**Lene Myhren**, Oral Health Centre of Expertise Rogaland, Stavanger, Rogaland, Norway  
**Shillpa Naavaal**, Virginia Commonwealth University, Richmond, Virginia, USA  
**Koratagere Nagesh**, Krupa Dental Clinic, Bengaluru, Karnataka, India  
**Gustavo G. Nascimento**, Aarhus University, Aarhus, Jutland, Denmark  
**Jessica A. Naylor**, University of Bristol, Bristol, United Kingdom of Great Britain and Northern Ireland  
**Cecelia Nelson**, West Virginia University, Morgantown, West Virginia, USA

**Travis Nelson**, University of Washington, Seattle, Washington, USA  
**Suchitra Nelson**, Case Western Reserve University, Cleveland, Ohio, USA  
**Sudan Prasad Neupane**, Specialist Oral Health Center for Western Norway Department:  
Rogaland, Stavanger, Rogaland, Norway  
**Patricia Neville**, University of Bristol, Bristol, Avon, United Kingdom of Great Britain and  
Northern Ireland  
**Tan Minh Nguyen**, Deakin University, Melbourne, Victoria, Australia  
**Muhammad Omar Niaz**, Pakistan Medical Commission, Islamabad, Federal Capital, Pakistan  
**Richard Niederman**, New York University, New York, New York, USA  
**Herry Novrinda**, Universitas Indonesia, Jakarta Pusat, DKI Jakarta, Indonesia  
**Nazik Nurelhuda**, University of Khartoum, Khartoum, Khartoum State, Sudan  
**Sivakumar Nuvvula**, Narayana Dental College and Hospital, Nellore, Andhra Pradesh, India  
**Kevin Nyadwe**, University of Nairobi, Nairobi, Kenya  
**Lucy O'malley**, University of Manchester, Manchester, England, United Kingdom of Great  
Britain and Northern Ireland  
**Richard Ohrbach**, University at Buffalo, Buffalo, New York, USA  
**Christopher Okunseri**, Marquette University, Milwaukee, Wisconsin, USA  
**Branca Heloisa de Oliveira**, Rio de Janeiro State University, Rio de Janeiro, Brazil  
**Maisa Omara**, Medical University of Vienna, Vienna, Austria  
**Olubunmi Oni**, University College Hospital, Ibadan, Oyo, Nigeria  
**Frank Oppenheim**, Boston University Medical Center, Boston, Massachusetts, USA  
**Gloria Pacheco**, Luna Community College, Las Vegas, New Mexico, USA  
**Fotinos Panagakos**, West Virginia University, Morgantown, West Virginia, USA  
**Sharat Chandra Pani**, Schulich School of Medicine and Dentistry, London, Ontario, Canada  
**Carrigan Parish**, Columbia University, New York, New York, USA  
**Candida Parisi**, University of Bologna, Bologna, Italy  
**Brian Partido**, Seattle Central College, Seattle, Washington, USA  
**Chris Penlington**, Newcastle University, Newcastle upon Tyne, Tyne and Wear, United  
Kingdom of Great Britain and Northern Ireland  
**Sílvia H. C. Sales Peres**, University of São Paulo, Bauru, São Paulo, Brazil  
**Arnaldo Perez**, University of Alberta, Edmonton, Alberta, Canada  
**Valerie Perrine**, West Virginia University, Morgantown, WV, USA  
**Helder Pinheiro**, Federal University of Pará, Belém, Pará, Brazil  
**Erica Torres de Almeida Piovesan**, University of Brasilia, Brasilia, Federal District, Brazil  
**A. Stephen Polins**, Henry M. Goldman School of Dental Medicine, Boston, Massachusetts,  
USA  
**Deborah E. Polk**, University of Pittsburgh, Pittsburgh, Pennsylvania, USA  
**C. Alec Pollard**, Saint University School of Medicine, St. Louis, Missouri, USA  
**Tracy E. Popowics**, University of Washington, Seattle, Washington, USA  
**Teodor T Postolache**, University of Maryland School of Medicine, Baltimore, Maryland, USA  
**Lauren B. Quetsch**, University of Arkansas, Fayetteville, Arkansas, USA  
**Sheela Raja**, University of Illinois at Chicago, Chicago, Illinois, USA  
**Aiameeza Rajali**, Universiti Teknologi MARA, Sg Buloh, Selangor, Malaysia  
**Isabel Rambob**, University of Maryland School of Dentistry, Baltimore, Maryland, USA  
**Roxana Patricia López Ramos**, Universidad Peruana Cayetano Heredia, San Martin de  
Porres, Lima, Peru  
**Cameron L. Randall**, University of Washington, Seattle, Washington, USA  
**Haslina Rani**, Universiti Kebangsaan Malaysia, Kuala Lumpur, Kuala Lumpur, Malaysia  
**Sarah E. Raskin**, Virginia Commonwealth University, Richmond, Virginia, USA  
**Said Harith Al Rawahi**, Oman Dental College, Muscat, Oman, King's College London, London,  
United Kingdom of Great Britain and Northern Ireland  
**Kadambari Rawal**, Boston University Henry M Goldman School of Dental Medicine, Boston,  
Massachusetts, USA  
**Ignacio N. Retamal**, Universidad de los Andes, Santiago, Región Metropolitana, Chile

**Christine A. Riedy**, Harvard School of Dental Medicine, Boston, MA, USA  
**D. Brad Rindal**, Health Partners Institute, Minneapolis, Minnesota, USA  
**John Rogers**, University of Melbourne, Melbourne, Victoria, Australia  
**Arisson R. da Rosa**, UNISINOS, São Leopoldo, Rio Grande do Sul, Brazil  
**Rose Anne Q. Rosanes**, University of the Philippines Manila, Manila, NCR, Philippines  
**Karolyn D. Ruggles**, West Virginia University, Morgantown, West Virginia, USA  
**Budi Aslinie Md Sabri**, Universiti Teknologi MARA, Sungai Buloh, Selangor, Malaysia  
**Magdalena San-Martin**, Universidad Católica del Uruguay, Montevideo, Montevideo, Uruguay  
**Sylvia L Santos**, SLS Clinical Research Consulting, LLC, Montville, New Jersey, USA  
**Cornelia Melinda Adi Santoso**, University of Debrecen, Debrecen, Hajdú-Bihar, Hungary  
**Yoshiyuki Sasaki**, Tokyo Medical and Dental University, Bunkyo-ku, Tokyo, Japan  
**Carly Scala**, West Virginia University, Morgantown, West Virginia, USA  
**Brette Scala**, West Virginia University, Charleston, West Virginia, USA  
**Sasha Scambler**, King's College London, London, United Kingdom of Great Britain and Northern Ireland  
**Gottfried Schmalz**, University Hospital Regensburg, Regensburg, Bavaria, Germany  
**Helena Silveira Schuch**, Federal University of Pelotas, Pelotas, Rio Grande do Sul, Brazil  
**Suzanne E. Scott**, King's College London, London, United Kingdom of Great Britain and Northern Ireland  
**Gerhard K. Seeberger**, Academy of Dentistry International, San Antonio, Texas, USA  
**Laura D. Seligman**, University of Texas Rio Grande Valley, Edinburg, Texas, USA  
**Amit Sethi**, Boston University, Boston, Massachusetts, USA  
**John R. Shaffer**, University of Pittsburgh, Pittsburgh, Pennsylvania, USA  
**Sonia Sharma**, University at Buffalo, Buffalo, New York, USA  
**Swati Lavani Sharma**, University of Arkansas for Medical Sciences, Little Rock, Arkansas, USA  
**Alcinda K Trickett Shockey**, West Virginia University School of Dentistry, Morgantown, West Virginia, USA  
**Nazli G. Shujaat**, University of Health Sciences, Lahore, Punjab, Pakistan  
**Fawaz Shamim Siddiqui**, Penang International Dental College, Butterworth, Penang, Malaysia  
**Sharanbir K. Sidhu**, Queen Mary University of London, London, United Kingdom of Great Britain and Northern Ireland  
**Miguel Simancas-Pallares**, University of North Carolina at Chapel Hill, Chapel Hill, North Carolina, USA  
**Melanie Simmer-Beck**, University of Missouri-Kansas City, Kansas City, Missouri, USA  
**Kirt E. Simmons**, University of Arkansas for Medical Sciences, Little Rock, Arkansas, USA  
**Ankur Singh**, University of Melbourne, Melbourne, Victoria, Australia  
**Astha Singhal**, Boston University, Boston, Massachusetts, USA  
**Jeanne Craig Sinkford**, Howard University College of Dentistry, Washington D.C., USA  
**Linda Slack-Smith**, University of Western Australia, Perth, Western Australia, Australia  
**Michael C. Smith**, University of Melbourne, Melbourne, Victoria, Austria  
**Ahmad Sofi-Mahmudi**, Cochrane Iran, Seqiz, Kurdistan, Iran, Kurdistan  
**Woosung Sohn**, University of Sydney, Sydney, New South Wales, Australia  
**Oyinkansola Sofola**, University of Lagos, Nigeria  
**Kalo C. Sokoto**, West Virginia University, Morgantown, West Virginia, USA  
**Ana L. Sorazabal**, Universidad de Buenos Aires, Buenos Aires City, Buenos Aires, Argentina  
**Nicholas Sotak**, University of Washington, Seattle, Washington, USA  
**Avron Spiro**, Boston University Goldman School of Dental Medicine, Boston, Massachusetts, USA  
**Aldo Squassi**, Universidad De Buenos Aires, Buenos Aires, CABA, Argentina  
**Sukeshana Srivastav**, All India Institute of Medical Sciences, New Delhi, Delhi, India  
**Jane E. M. Steffensen**, Tufts University School of Dental Medicine, Boston, Massachusetts, USA  
**David M. S. Stewart**, PDC Pediatric Dentistry, South Jordan, Utah, USA

**Bernal Stewart**, Colgate Palmolive, Somerset, New Jersey, USA  
**Ronald P. Strauss**, University of North Carolina at Chapel Hill, Chapel Hill, North Carolina, USA  
**Joel L. Strom**, Forsyth Dental Institute, Boston, Massachusetts, USA  
**Anna Liisa Suominen**, University of Eastern Finland, Kuopio, Northern Savo, Finland  
**Santosh Kumar Tadakamadla**, Griffith University, Gold Coast, Queensland, Australia  
**Tayla Tallman**, West Virginia University, Morgantown, West Virginia, USA  
**Guillermo Tamayo-Cabeza**, Universidad de Cartagena, Cartagena, Bolívar, Colombia  
**Sharon Tan**, National University of Singapore, Singapore, Singapore  
**Maha El Tantawi**, Alexandria University, Alexandria, Egypt  
**Mary Tavares**, The Forsyth Institute Cambridge, Boston University, Boston, Massachusetts, USA  
**Greig Daniel Taylor**, Newcastle University, Newcastle Upon Tyne, Tyne and Wear, United Kingdom of Great Britain and Northern Ireland  
**Stuart Taylor**, University of Washington, Seattle, Washington, USA  
**Marisol Tellez**, Maurice H. Kornberg School of Dentistry, Temple University, Philadelphia, Pennsylvania, USA  
**Wendy Thompson**, University of Manchester, Manchester, Greater Manchester, United Kingdom of Great Britain and Northern Ireland  
**W. Murray Thomson**, University of Otago, Dunedin, Otago, New Zealand  
**Tamanna Tiwari**, University of Colorado, Aurora, Colorado, USA  
**Mimmi Tolvanen**, University of Oulu, Oulu, Valitse alue, osavaltio tai provinssi (käytössä US-osoitteissa), Finland  
**Scott L. Tomar**, University of Illinois Chicago, Chicago, Illinois, USA  
**Georgios Tsakos**, University College London, Greater London, United Kingdom of Great Britain and Northern Ireland  
**Bathsheba Turton**, University of Puthisastra, Phnom Penh, Cambodia  
**Yap Adrian Ujin**, Ng Teng Fong General Hospital, Singapore, Singapore  
**Lidia A. R. Valadas**, University of Buenos Aires, Buenos Aires, Buenos Aires, Argentina  
**Erinn J. Victory**, West Virginia University, Morgantown, West Virginia, USA  
**Jorma Virtanen**, University of Bergen, Bergen, Hordaland, Norway  
**Catherine G Waldron**, Dublin Dental University Hospital, Dublin, Dublin, Ireland  
**Christopher Waters**, West Virginia University, Morgantown, West Virginia, USA  
**Richard G. Watt**, UCL, London, Greater London, United Kingdom of Great Britain and Northern Ireland  
**Andrea Waylen**, University of Bristol, Bristol, Bristol, United Kingdom of Great Britain and Northern Ireland  
**Carolyn J. Wehler**, Boston University, Boston, Massachusetts, USA  
**Jane A. Weintraub**, University of North Carolina at Chapel Hill, Chapel Hill, North Carolina, USA  
**Meghan Wendland**, University of Missouri, Kansas City, Missouri, USA  
**Christina Worle**, Peninsula Dental Social Enterprise, Plymouth, Devon, United Kingdom of Great Britain and Northern Ireland  
**Casey D. Wright**, West Virginia University, Morgantown, West Virginia, USA  
**Amjad H. Wyne**, Institution of Dentistry CMH Lahore Medical College, Lahore, Punjab, Pakistan  
**Nurul Asyikin Yahya**, Universiti Kebangsaan Malaysia, Kuala Lumpur, Kuala Lumpur, Malaysia  
**Siyang Yuan**, University of Dundee, Dundee, Scotland, United Kingdom of Great Britain and Northern Ireland  
**Norashikin Yusof**, Universiti Teknologi MARA, Shah alam, Selangor, Malaysia  
**Zamros Y. M. Yusof**, Universiti Malaya, Kuala Lumpur, Wilayah Persekutuan Kuala Lumpur, Malaysia  
**Marieke van der Zande**, University of Liverpool, Liverpool, Merseyside, United Kingdom of Great Britain and Northern Ireland  
**Kawtar Zouaidi**, The University of Texas Health Science Center, Houston, Texas, USA
